# Supplementary material
Source: PubMed Central journal article supplement (PMC5742059)

# Supplementary Figure 1

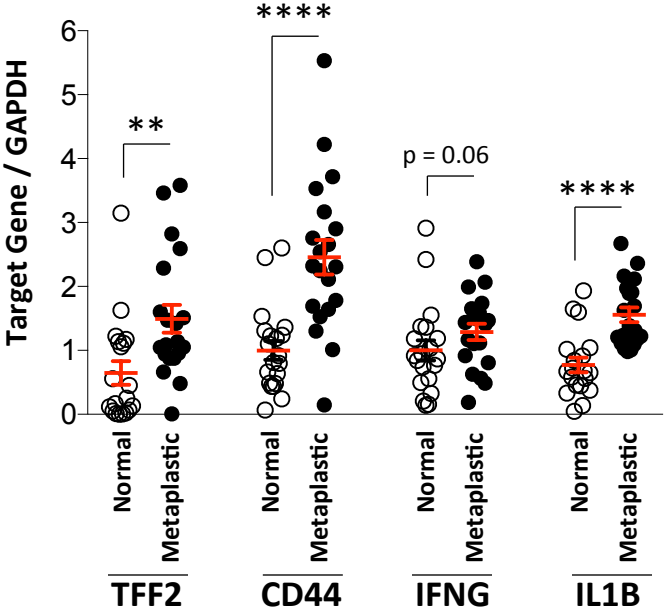

A

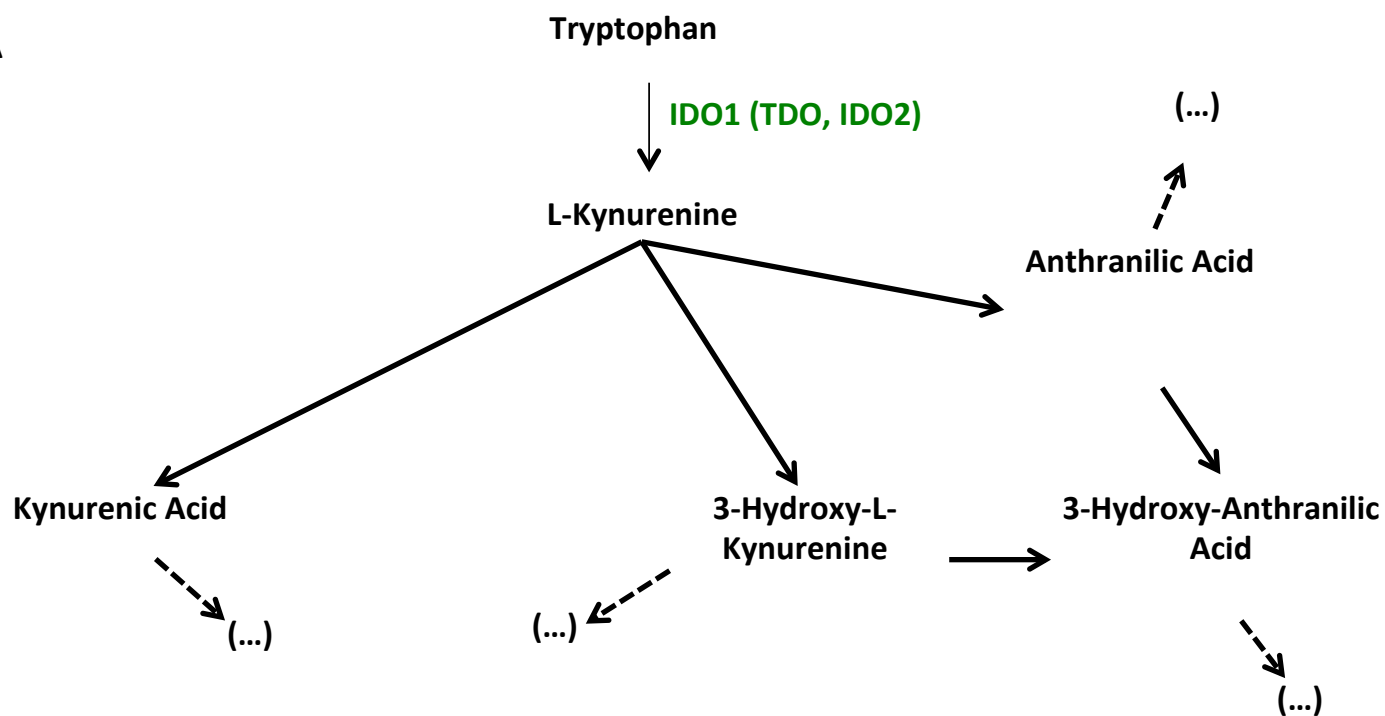

B

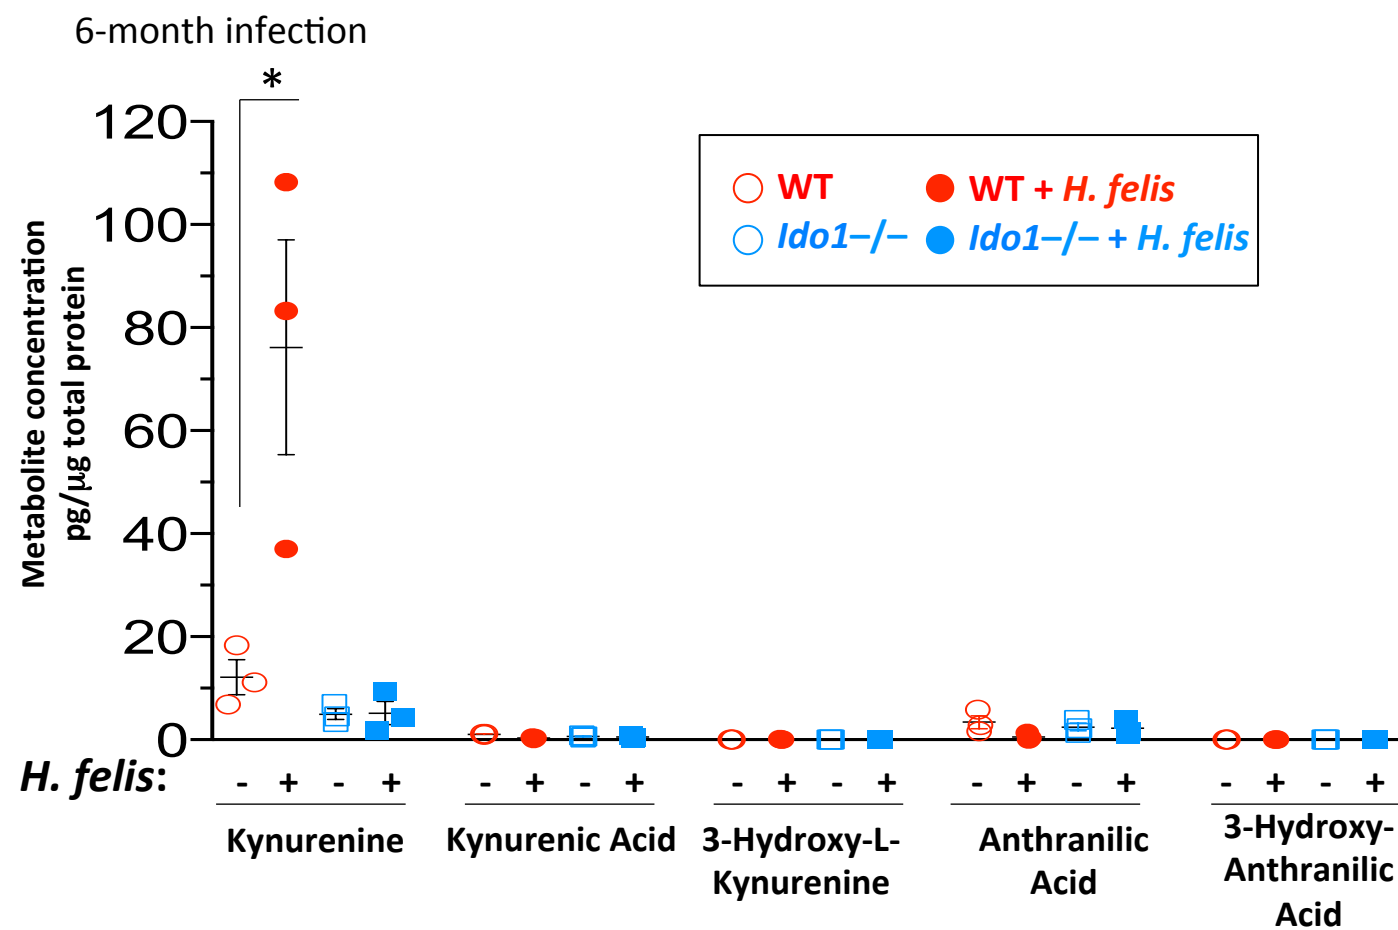

A

Normal

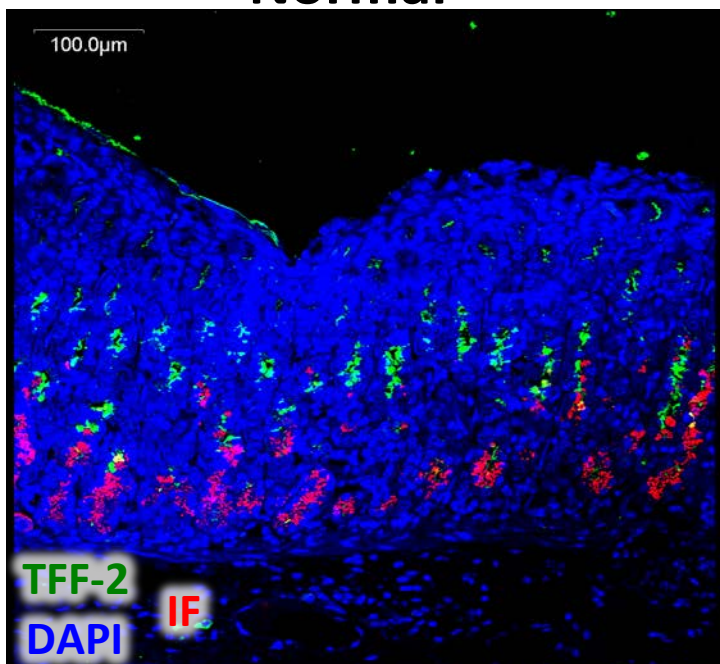

Metaplastic

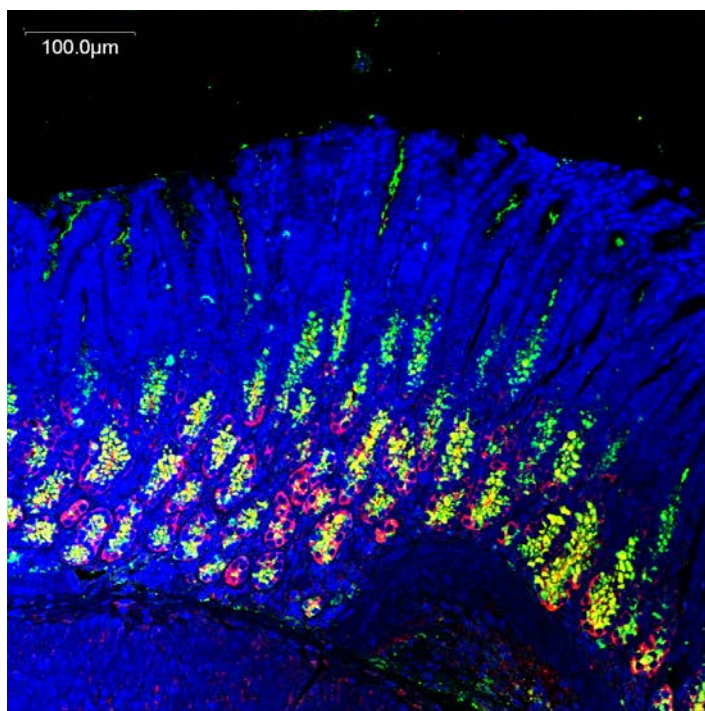

B

Normal

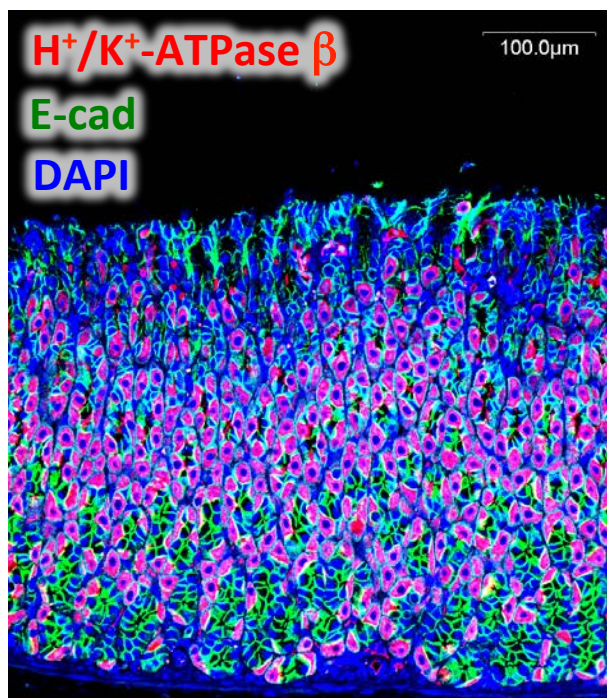

Parietal Cell Loss

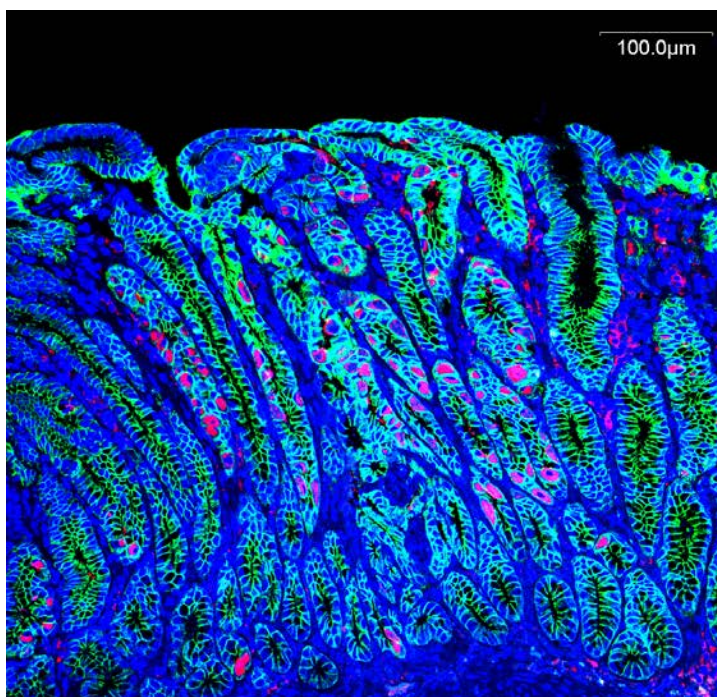

# Supplementary Figure 4

## A

### *IDO1* mRNA

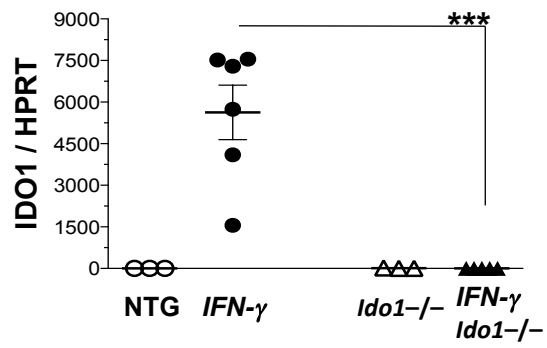

## B

### *Igk v1-133* mRNA

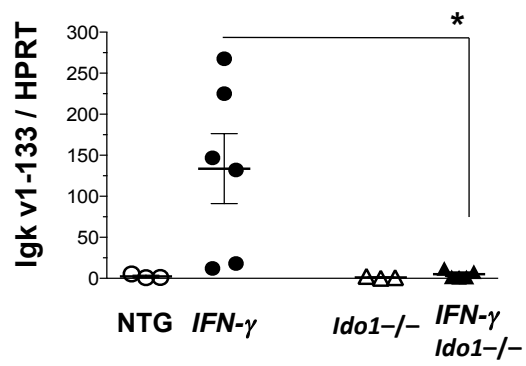

# Supplementary Figure 5

**A**

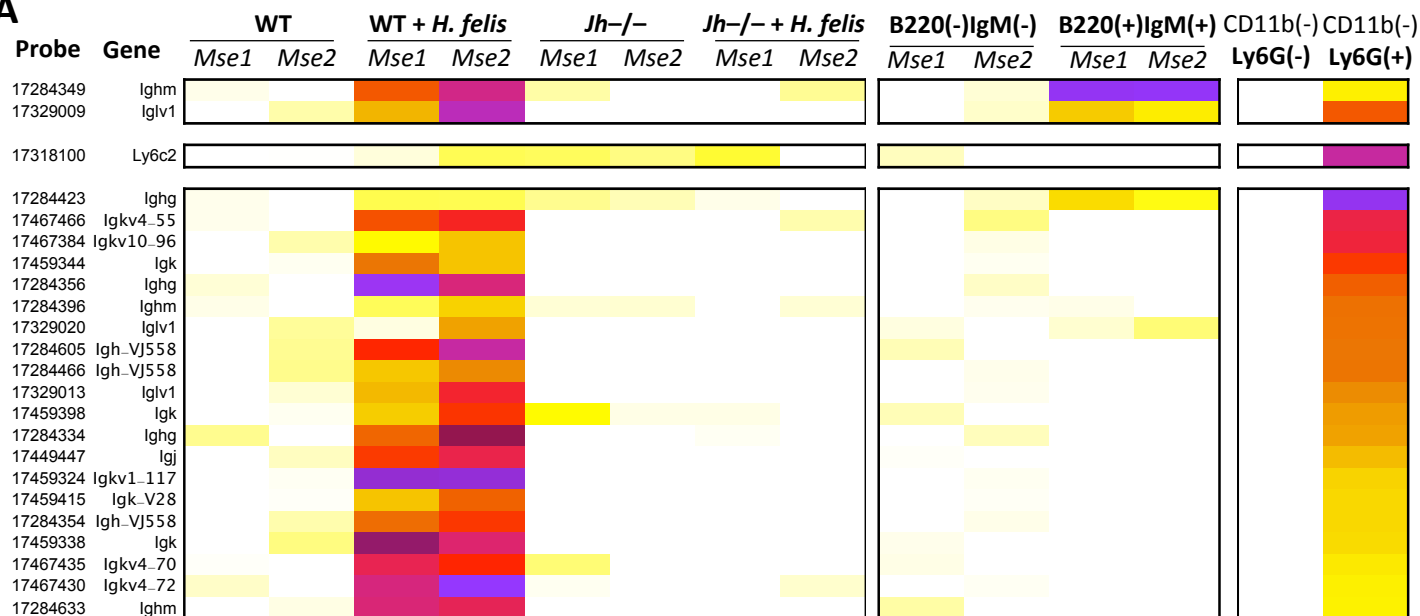

**B**

Gating: Live Cells

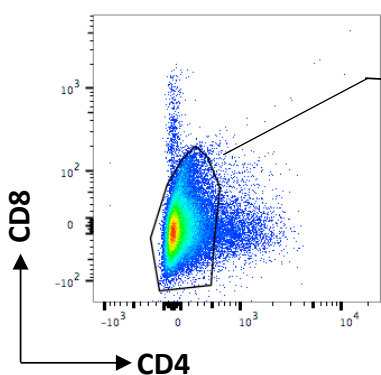

**C**

Gating: CD4(-)CD8(-)

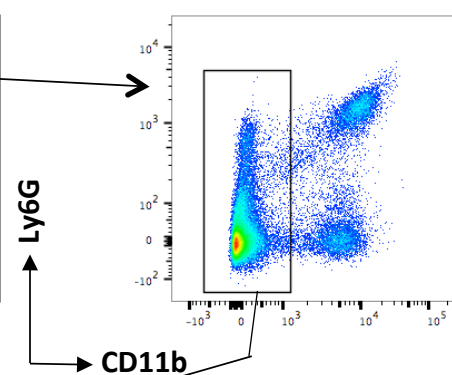

**D**

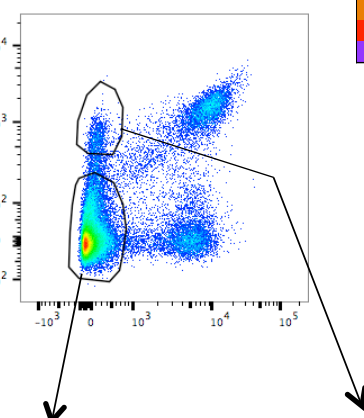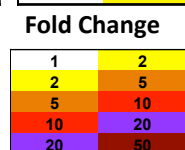

**E**

Gating: CD11b(-)

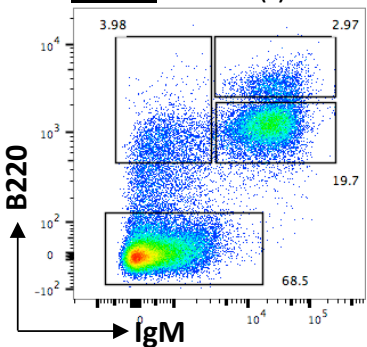

**F**

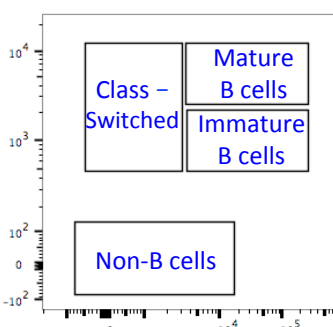

**G**

Sub-Gating: Ly6G(-)

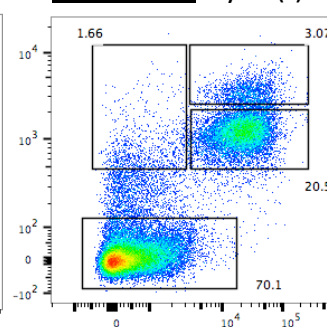

**H**

Sub-Gating: Ly6G(+)

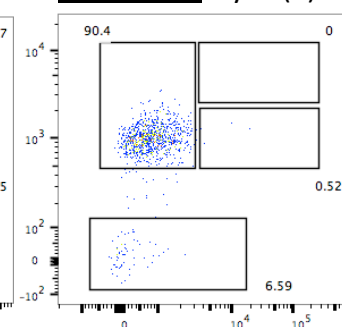

**I**

*WT + H. felis*

*Ido1-/- + H. felis*

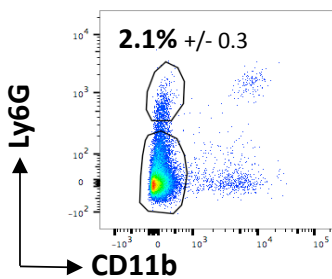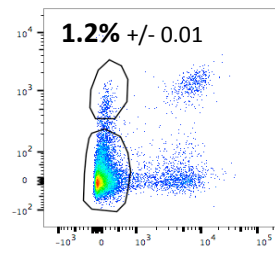

**A**

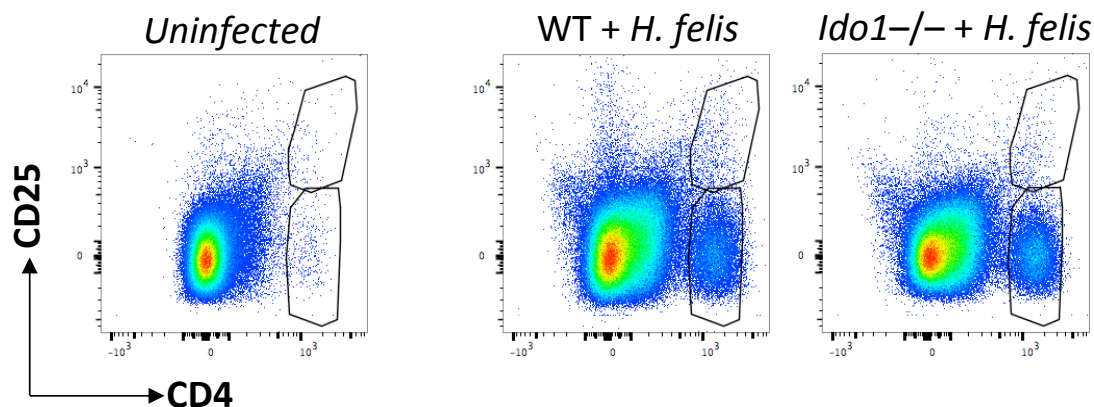

**B**

**Gastric CD4+CD25-  
FACS Quantification**

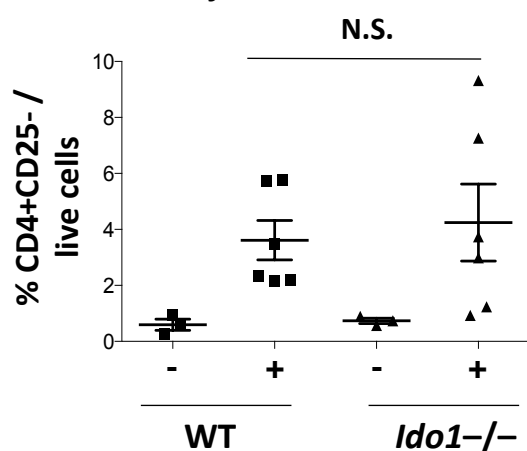

**C**

**Gastric CD4+CD25+  
FACS Quantification**

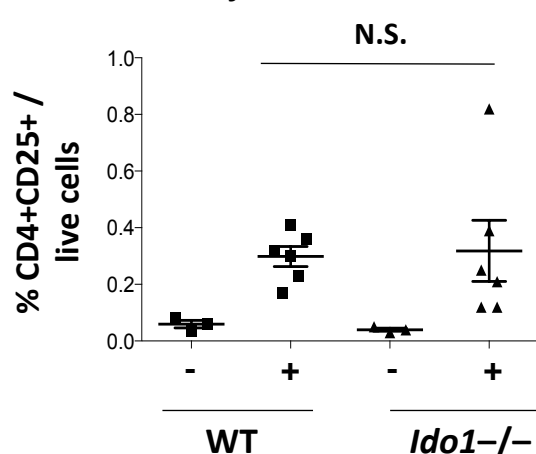

**D**

**IFN- $\gamma$  mRNA**

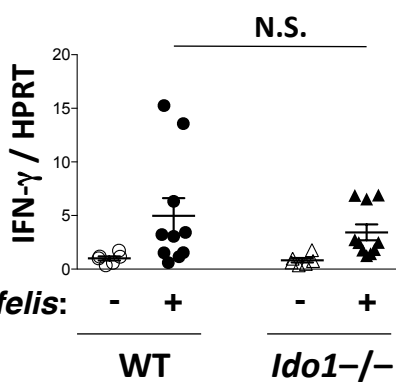

**TNF- $\alpha$  mRNA**

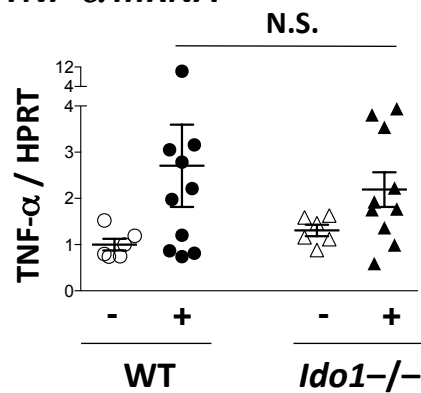

**IL-1 $\beta$  mRNA**

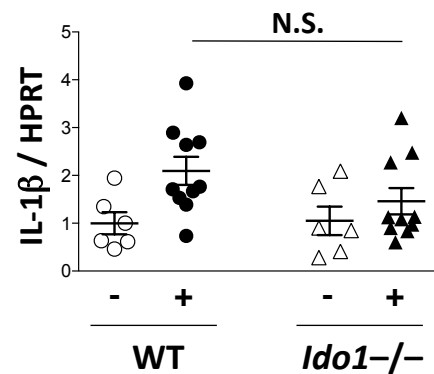

A

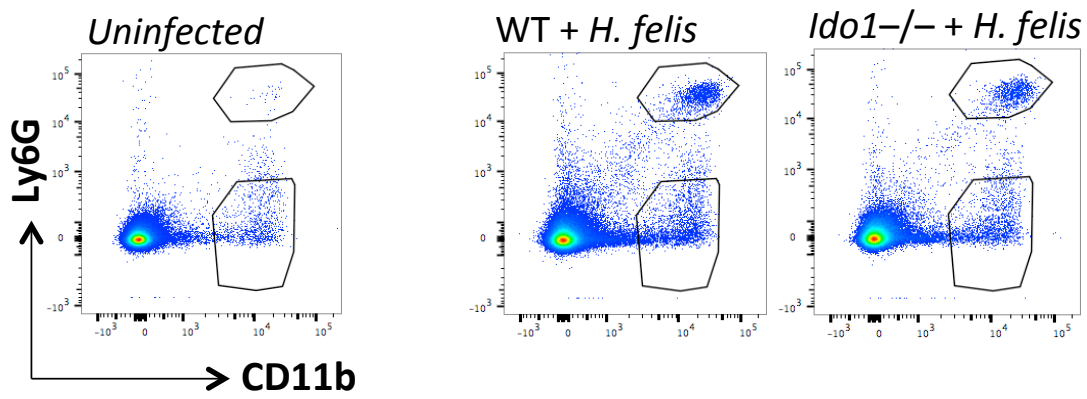

B

**Gastric CD11b<sup>+</sup> Ly6G<sup>+</sup> FACS Quantification**

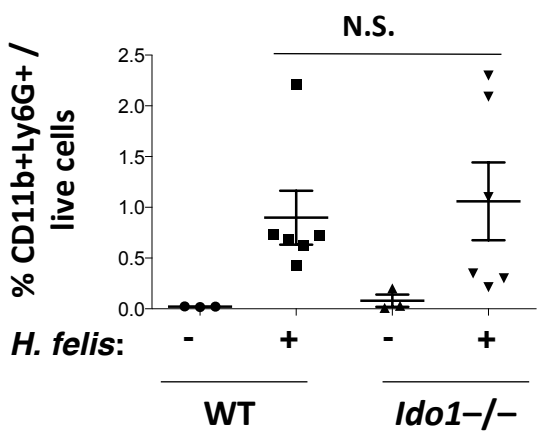

C

**Gastric CD11b<sup>+</sup> Ly6G<sup>-</sup> FACS Quantification**

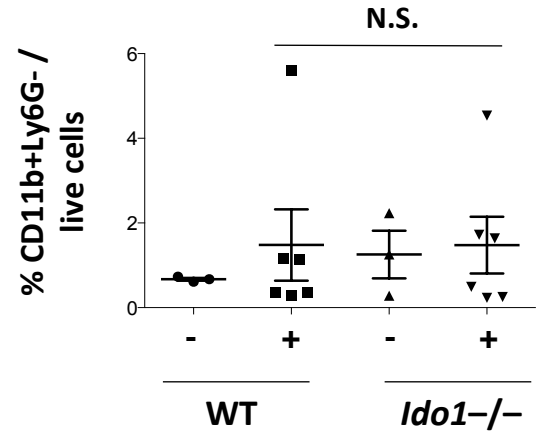

*H. felis* Fla-B qPCR

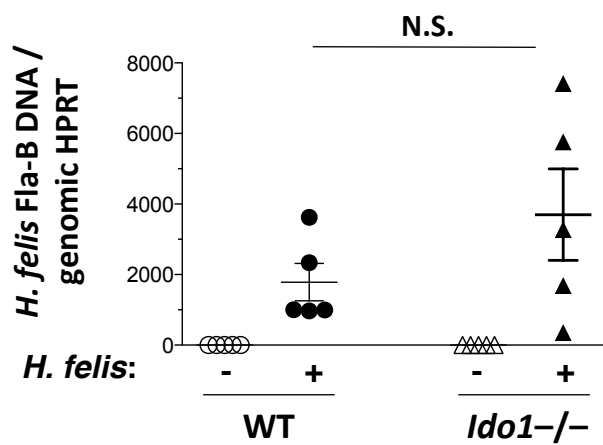



# Supplementary Figure 9

**A**

*WT + H. felis*

*WT*

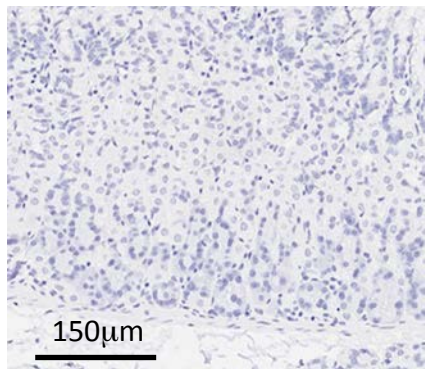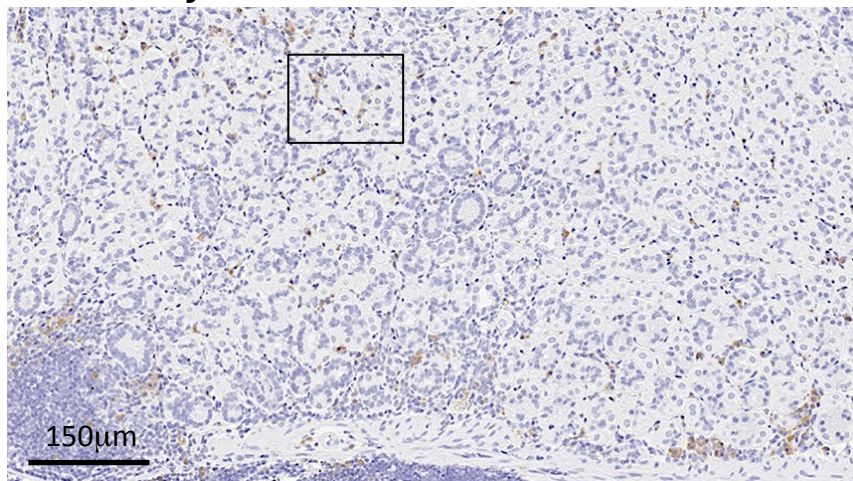

*Ido1*<sup>-/-</sup> + *H. felis*

*Ido1*<sup>-/-</sup>

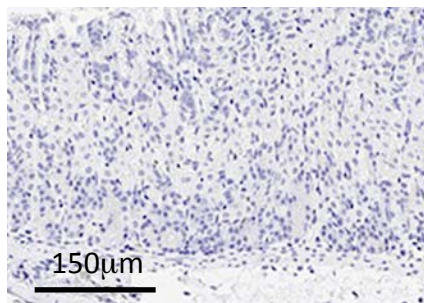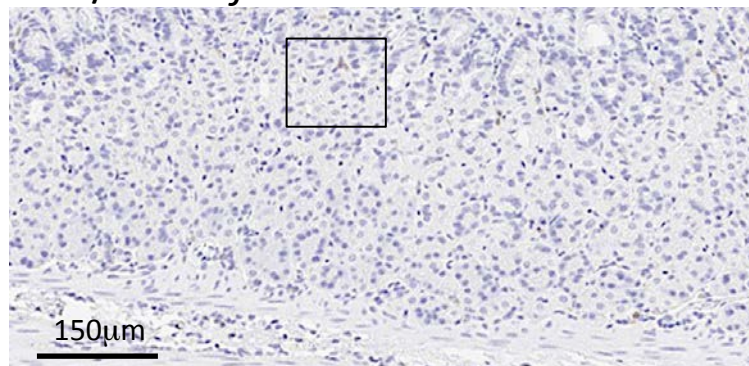

**B**

Positive Control

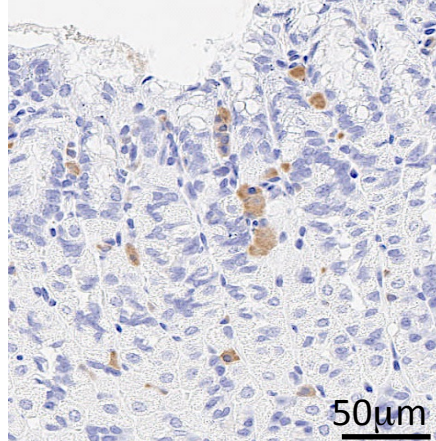

Negative Control

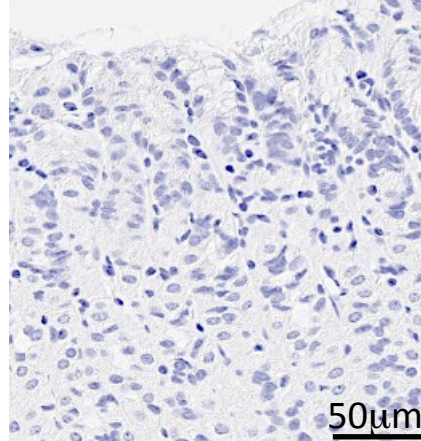

# Supplementary Figure 10

**A**

## Mouse Metaplastic Stomach Tissue

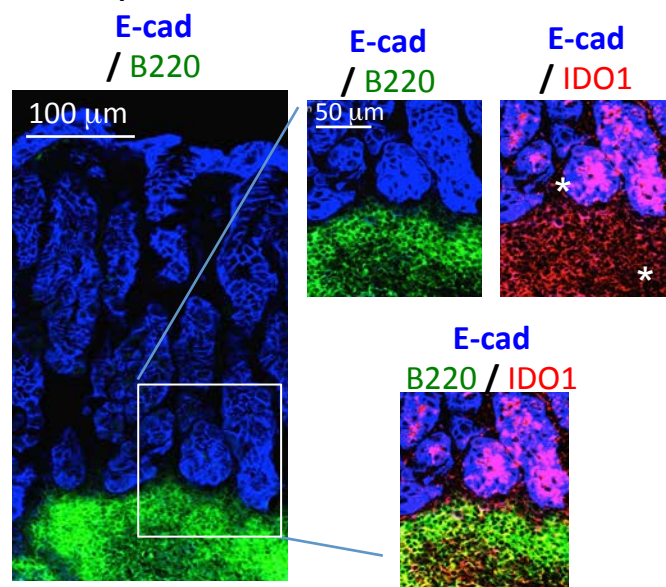

**B**

## Human Metaplastic Stomach Tissue

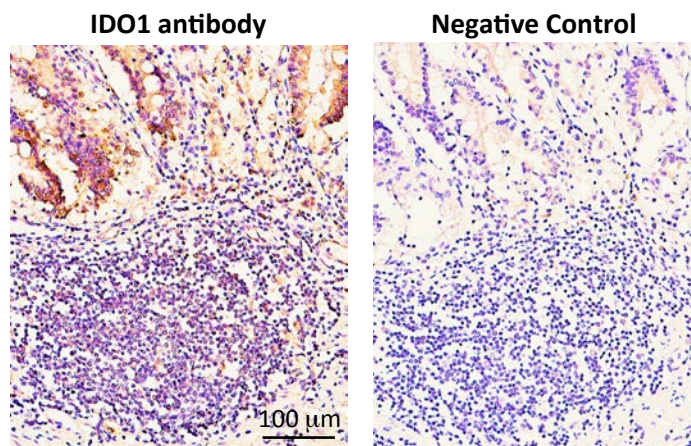

**C**

## Human Gastric Cancer Tissue

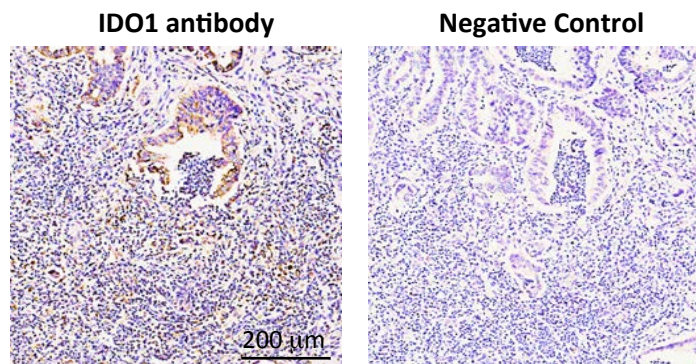

# Supplementary Figure 11

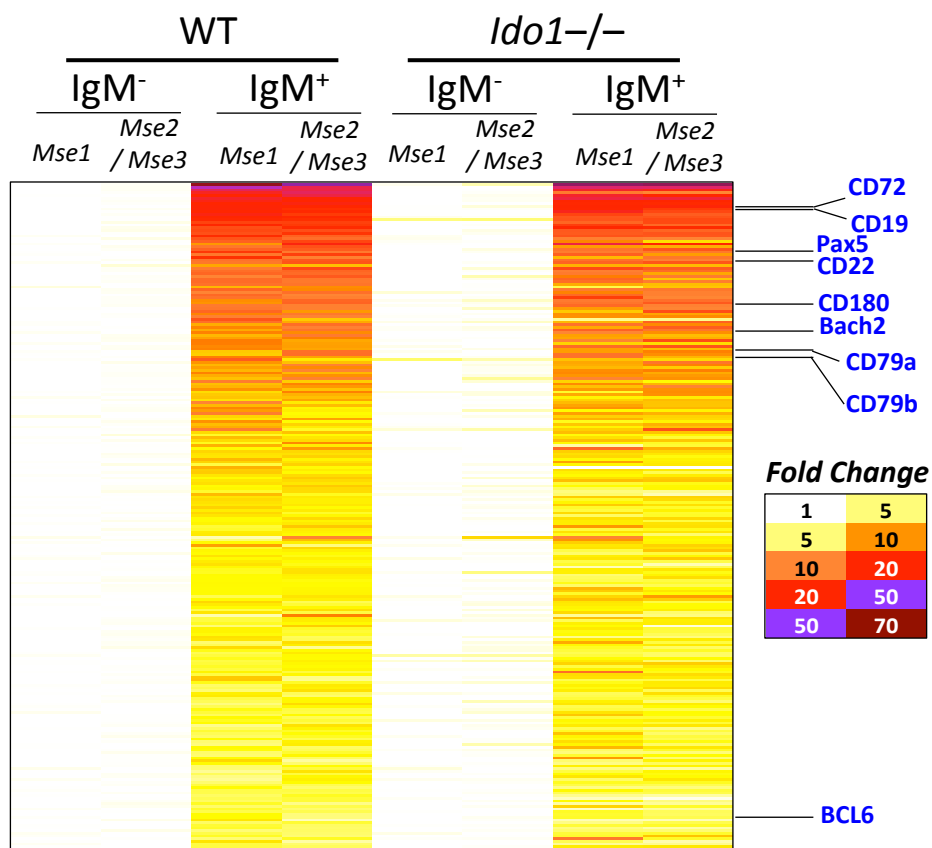

A

*H. felis* Fla-B qPCR

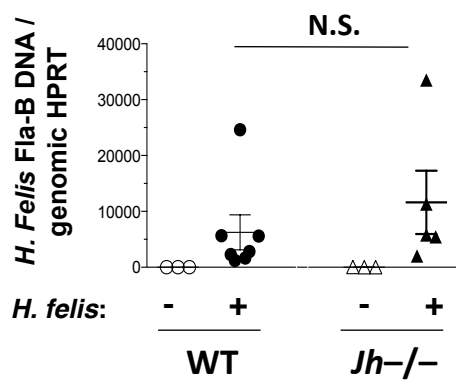

B

*CD79a* mRNA

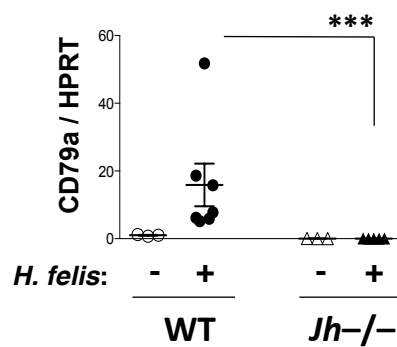

C

*Igk v1-133* mRNA

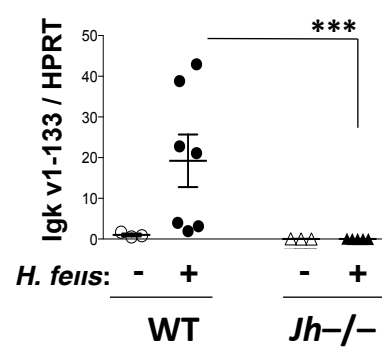

# Supplementary Figure 13

**A**

## Human vs *H. felis*

**Cluster 1**

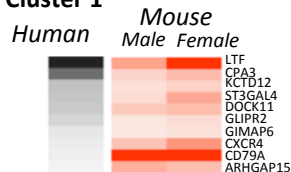

**Cluster 2**

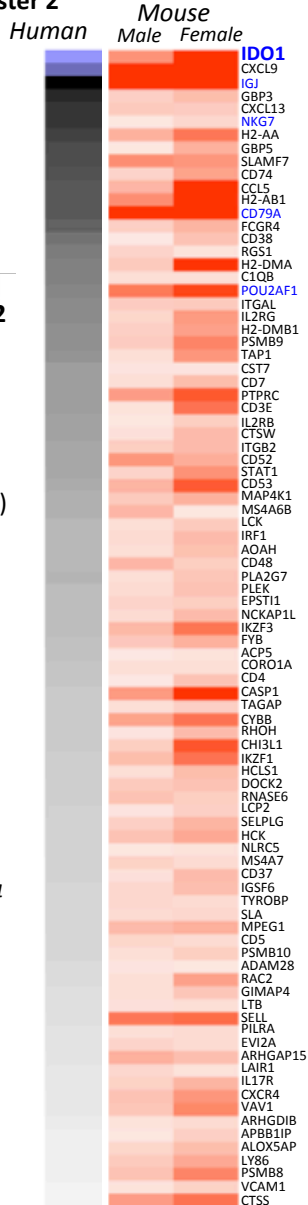

**Cluster 3**

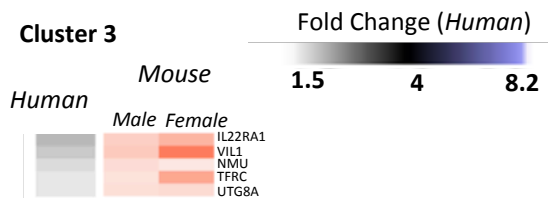

**Cluster 4**

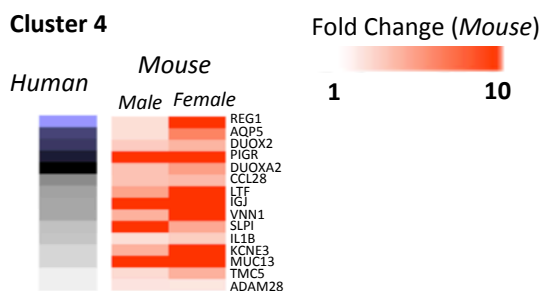

**B**

## HUMAN: (% Genes common to *H. felis* / Mouse)

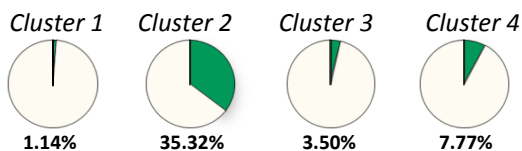

**C**

## MOUSE: (% Common to each cluster)

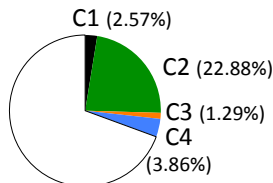

# Supplementary Figure 14

**A**

## Human (*expression clusters*) vs H<sup>+</sup>/K<sup>+</sup>-IFN- $\gamma$

**HUMAN:** (% Genes common to IFN- $\gamma$  / Mouse)

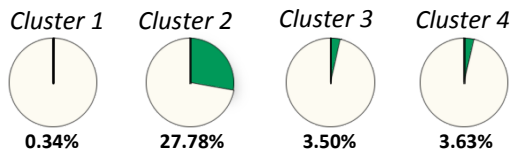

**B**

## Human (*overall subtypes*) vs H. felis model

**HUMAN:** (% Genes common to *H. felis* / Mouse)

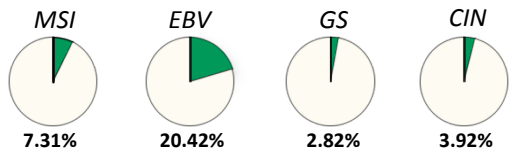

**C**

## Human (*overall subtypes*) vs H<sup>+</sup>/K<sup>+</sup>-IFN- $\gamma$

**HUMAN:** (% Genes common to IFN- $\gamma$  / Mouse)

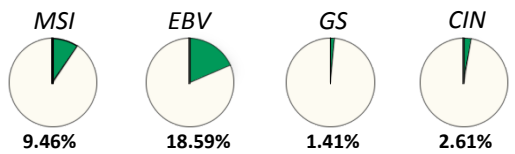

# Supplementary Diagram 1

## Metaplasia / Dysplasia

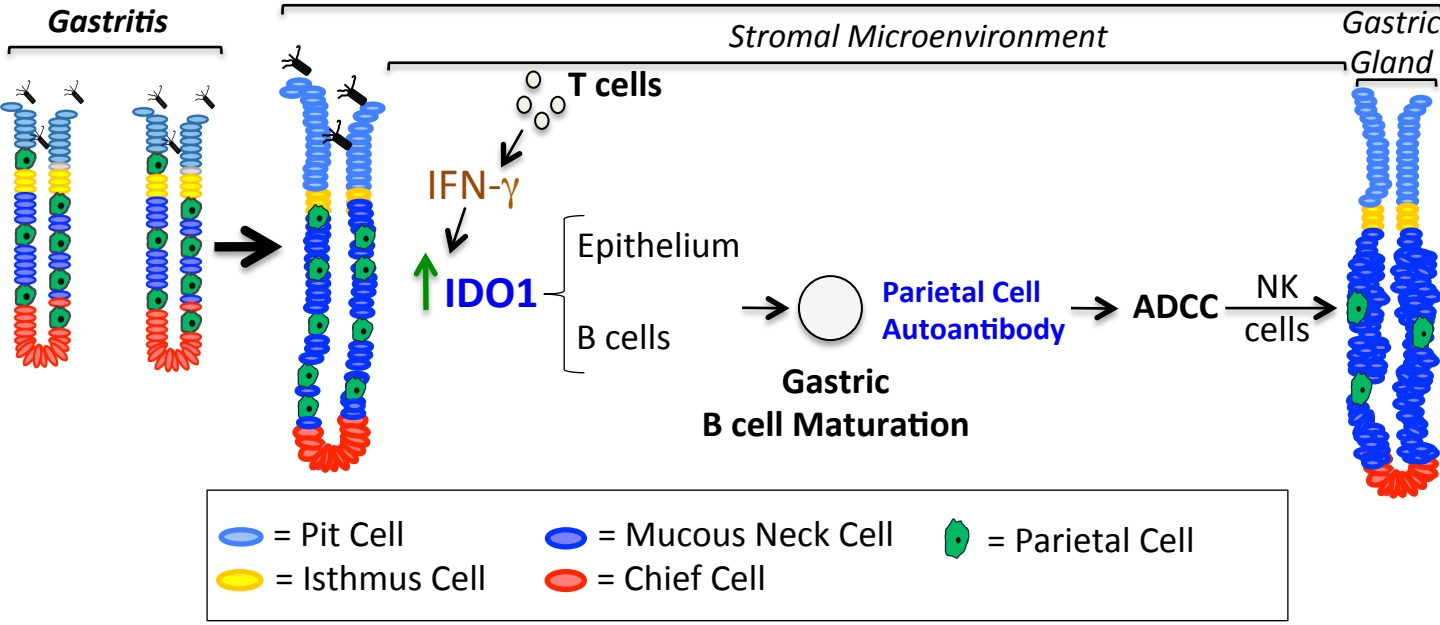

Supplement: NIHMS905591-supplement-6.pdf [file NIHMS905591-supplement-6.pdf]
